# Supplementary material
Source: PubMed Central journal article supplement (PMC1464477)

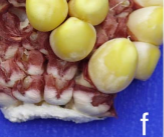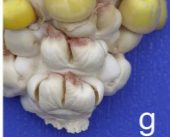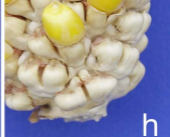

Supplement: NIHMS4328-supplement-Supp_Fig_1.pdf [file NIHMS4328-supplement-Supp_Fig_1.pdf]
